# Supplementary material
Source: publisher figshare collection journal article supplement (https://karger.figshare.com/articles/dataset/_/11603583)
Supplement: Supplementary file 1 [file 1]

Archive with 6 entries (6 files):
- Supplementary material_1__Ethical_approval_documents_.pdf
- Supplementary material_2__Details_of_methods.docx
- Supplementary material_Fig._1.jpg
- Supplementary material_Fig._2.jpg
- Supplementary material_Fig._3.jpg
- Supplementary material_Fig._4.jpg
