# Supplementary material
Source: publisher figshare collection journal article supplement (https://karger.figshare.com/articles/dataset/_/11603583)
Supplement: Supplementary file 1 [file 1 › Supplementary material_1__Ethical_approval_documents_.pdf]

## 湖北中医药大学医学伦理委员会批准件

[2015]IEC(003)号

项目针刺通过调控下丘脑 SIRT1/FoxO1 治疗胰岛素抵抗肥胖的机制研究涉及使用实验动物福利和伦理。经湖北中医药大学医学伦理委员会审议研究方案及实验动物使用情况，一致认为该项目在实验动物福利和伦理等方面符合《国家科技部关善待实验动物的指导意见》等法规的规定，同意开展研究。

湖北中医药大学医学伦理委员会

2015 年 3 月 5 日

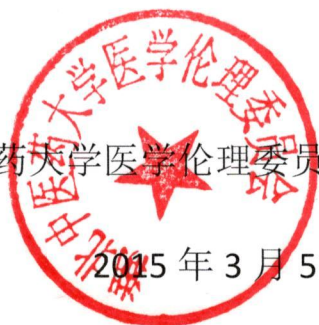

## **Translating documents**

Medical Ethics Committee approval document of Hubei

University of Chinese Medicine

[2015] IEC (003)

Project named **Mechanism of Acupuncture in Treating Insulin Resistance Obese through Modulating Hypothalamic SIRT1/FoxO1**

involvement in the application of experimental animal welfare and ethics.

The Medical Ethics Committee of Hubei University of Medicine considered the research protocol and the use of experimental animals compliance with 《Guideline on Handling Laboratory Animals》 in animal welfare and ethics published by the Ministry of Science and Technology of China and agreed to carry out this research.

Medical Ethics Committee of Hubei University of Medicine

March 5, 2015
