# Supplementary material
Source: publisher figshare collection journal article supplement (https://karger.figshare.com/articles/dataset/_/11603583)
Supplement: Supplementary file 1 [file 1 › Supplementary material_2__Details_of_methods.docx]

**Acupoints location**

- ST36 is located 5 mm below and lateral to the anterior tubercle of the tibia; ST40 is located in the middle of the anterior tubercle of the tibia and ankle. We inserted needles perpendicularly at ST36 and ST40 3–5 mm into the skin.
- CV4 is located at the juncture of upper 6/7 and lower 1/7 of the line that links the xiphoid process and external genitalia. At this point, we inserted the needle obliquely toward the xiphoid process for 3–5 mm.
- CV12 is located above the pubic crest at 9/14 of the line that links the top of the xiphoid process and the public crest. At this point, we inserted the needle obliquely towards the pubic crest for 3–5 mm.

**Caudal-artery and -vein** **hyperinsulinemic–euglycemic clamp [1]**

We took approximately 10μl blood from the caudal artery to measure glucose every five minutes using a glucose testing machine (OneTouch UltraVue; Johnson & Johnson, New Brunswick, NJ, US). After testing baseline glucose and before insulin infusion, we injected an insulin solution (50 mU/ml) into the caudal vein using a syringe pump (WZ-50F6, Smiths Medical, China) at a stable speed of 0.12 U/kg/h. When glucose was 0.5 mmol/L lower than baseline, we infused 30% glucose injection into the caudal vein using the syringe pump and adjusted the glucose infusion rate (GIR) every 5 minutes in response to the blood glucose concentration, with the objective of maintaining blood glucose level at the mean value obtained over a 15-minute period during the fasting stage.

1. Heise, T. *et al.* Euglycaemic glucose clamp: what it can and cannot do, and how to do it. *Diabetes, obesity & metabolism*. 2016;18: 962-972
