# Supplementary material
Source: publisher figshare collection journal article supplement (https://karger.figshare.com/articles/dataset/_/11603583)

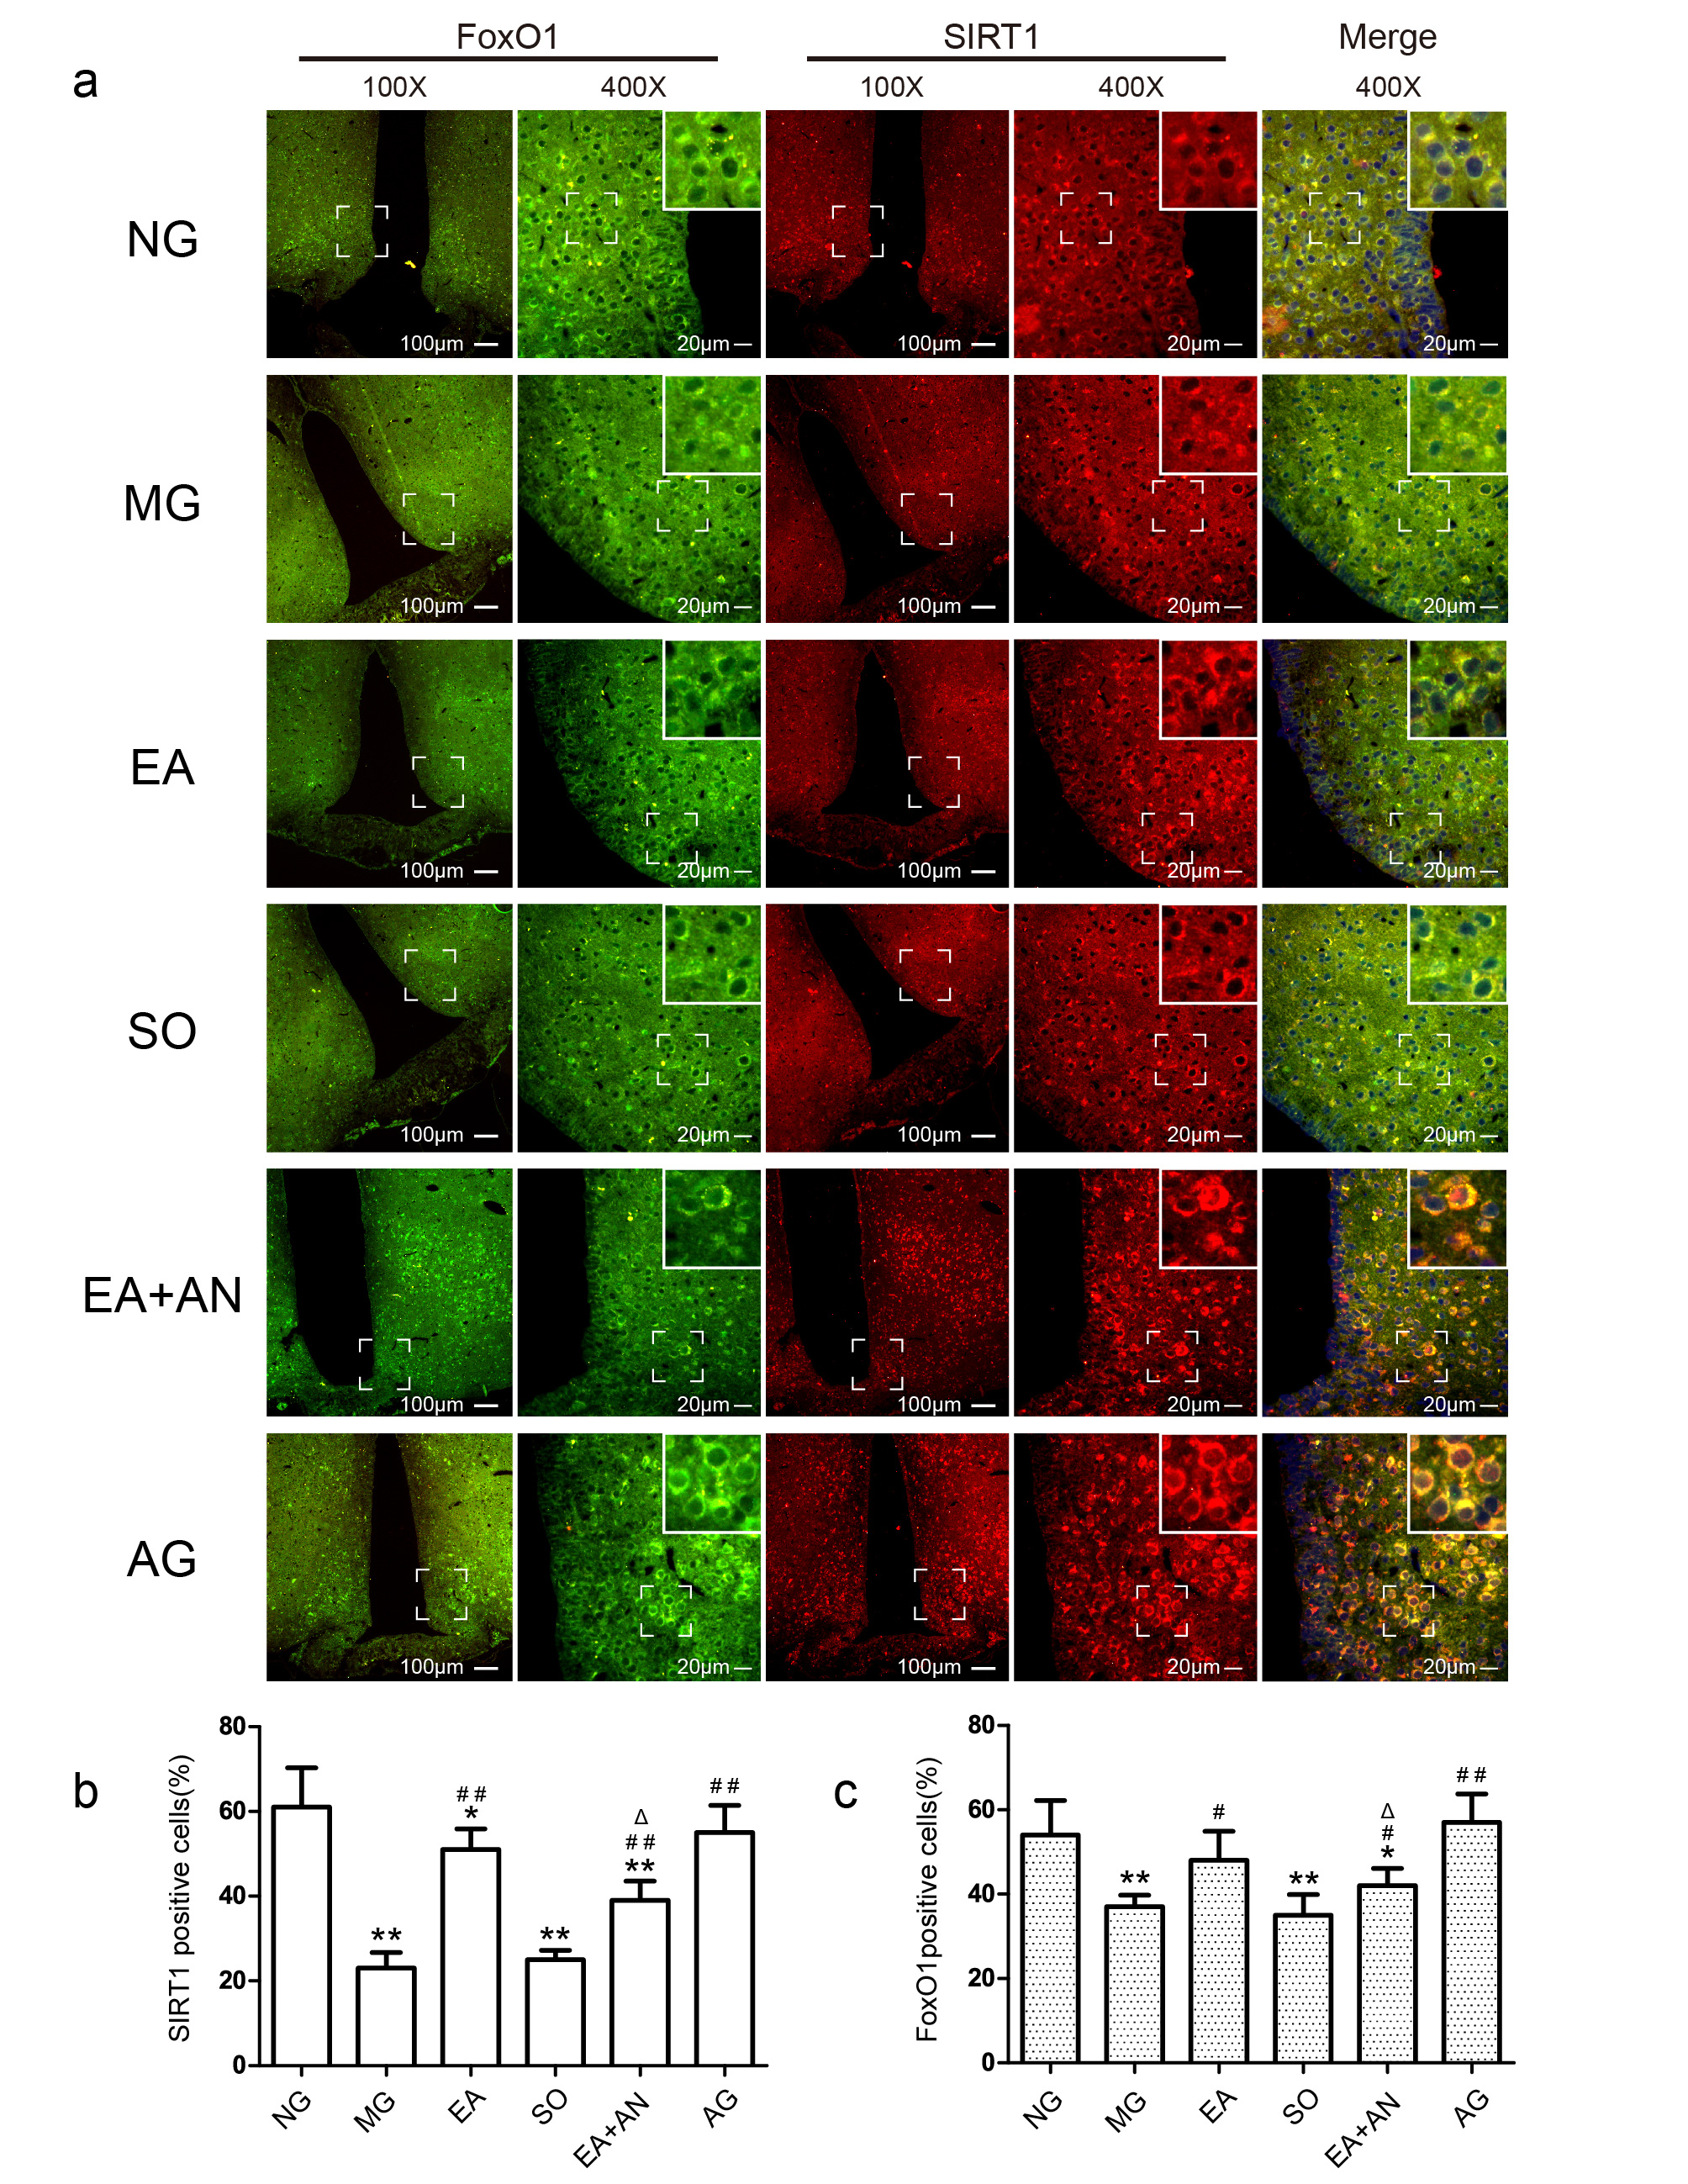

Supplement: Supplementary file 1 [file 1 › Supplementary material_Fig._1.jpg]

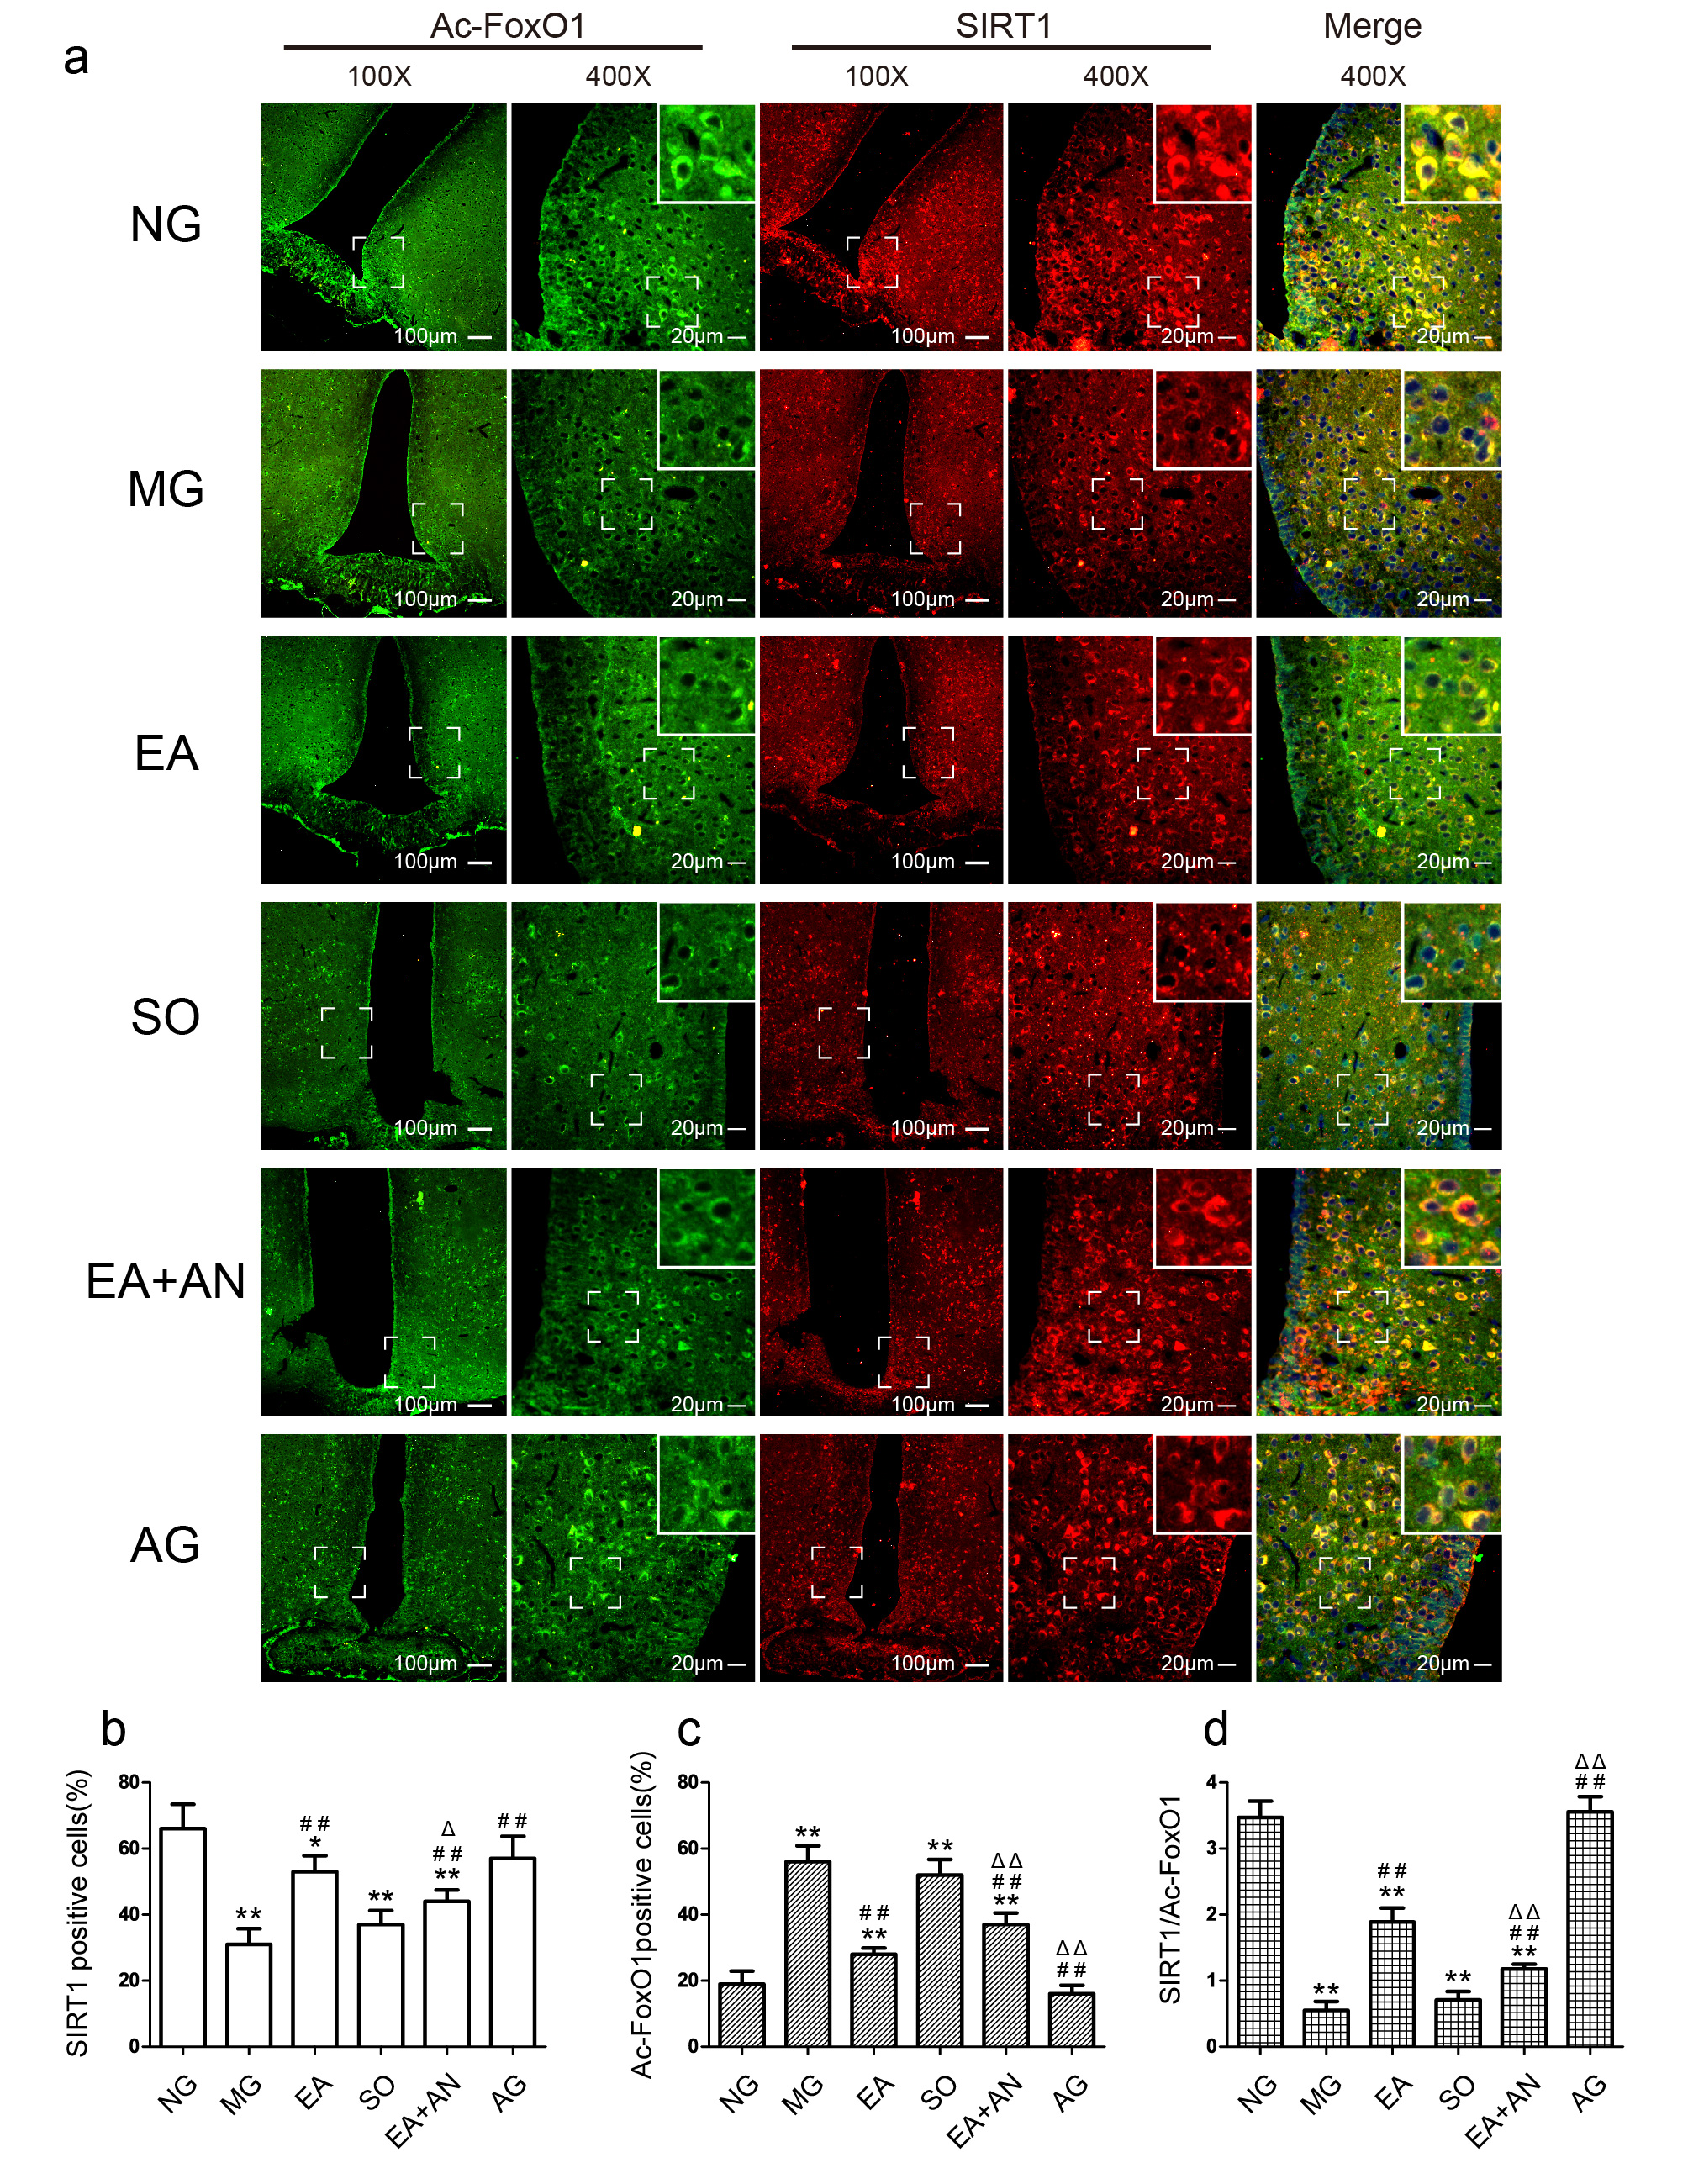

Supplement: Supplementary file 1 [file 1 › Supplementary material_Fig._2.jpg]

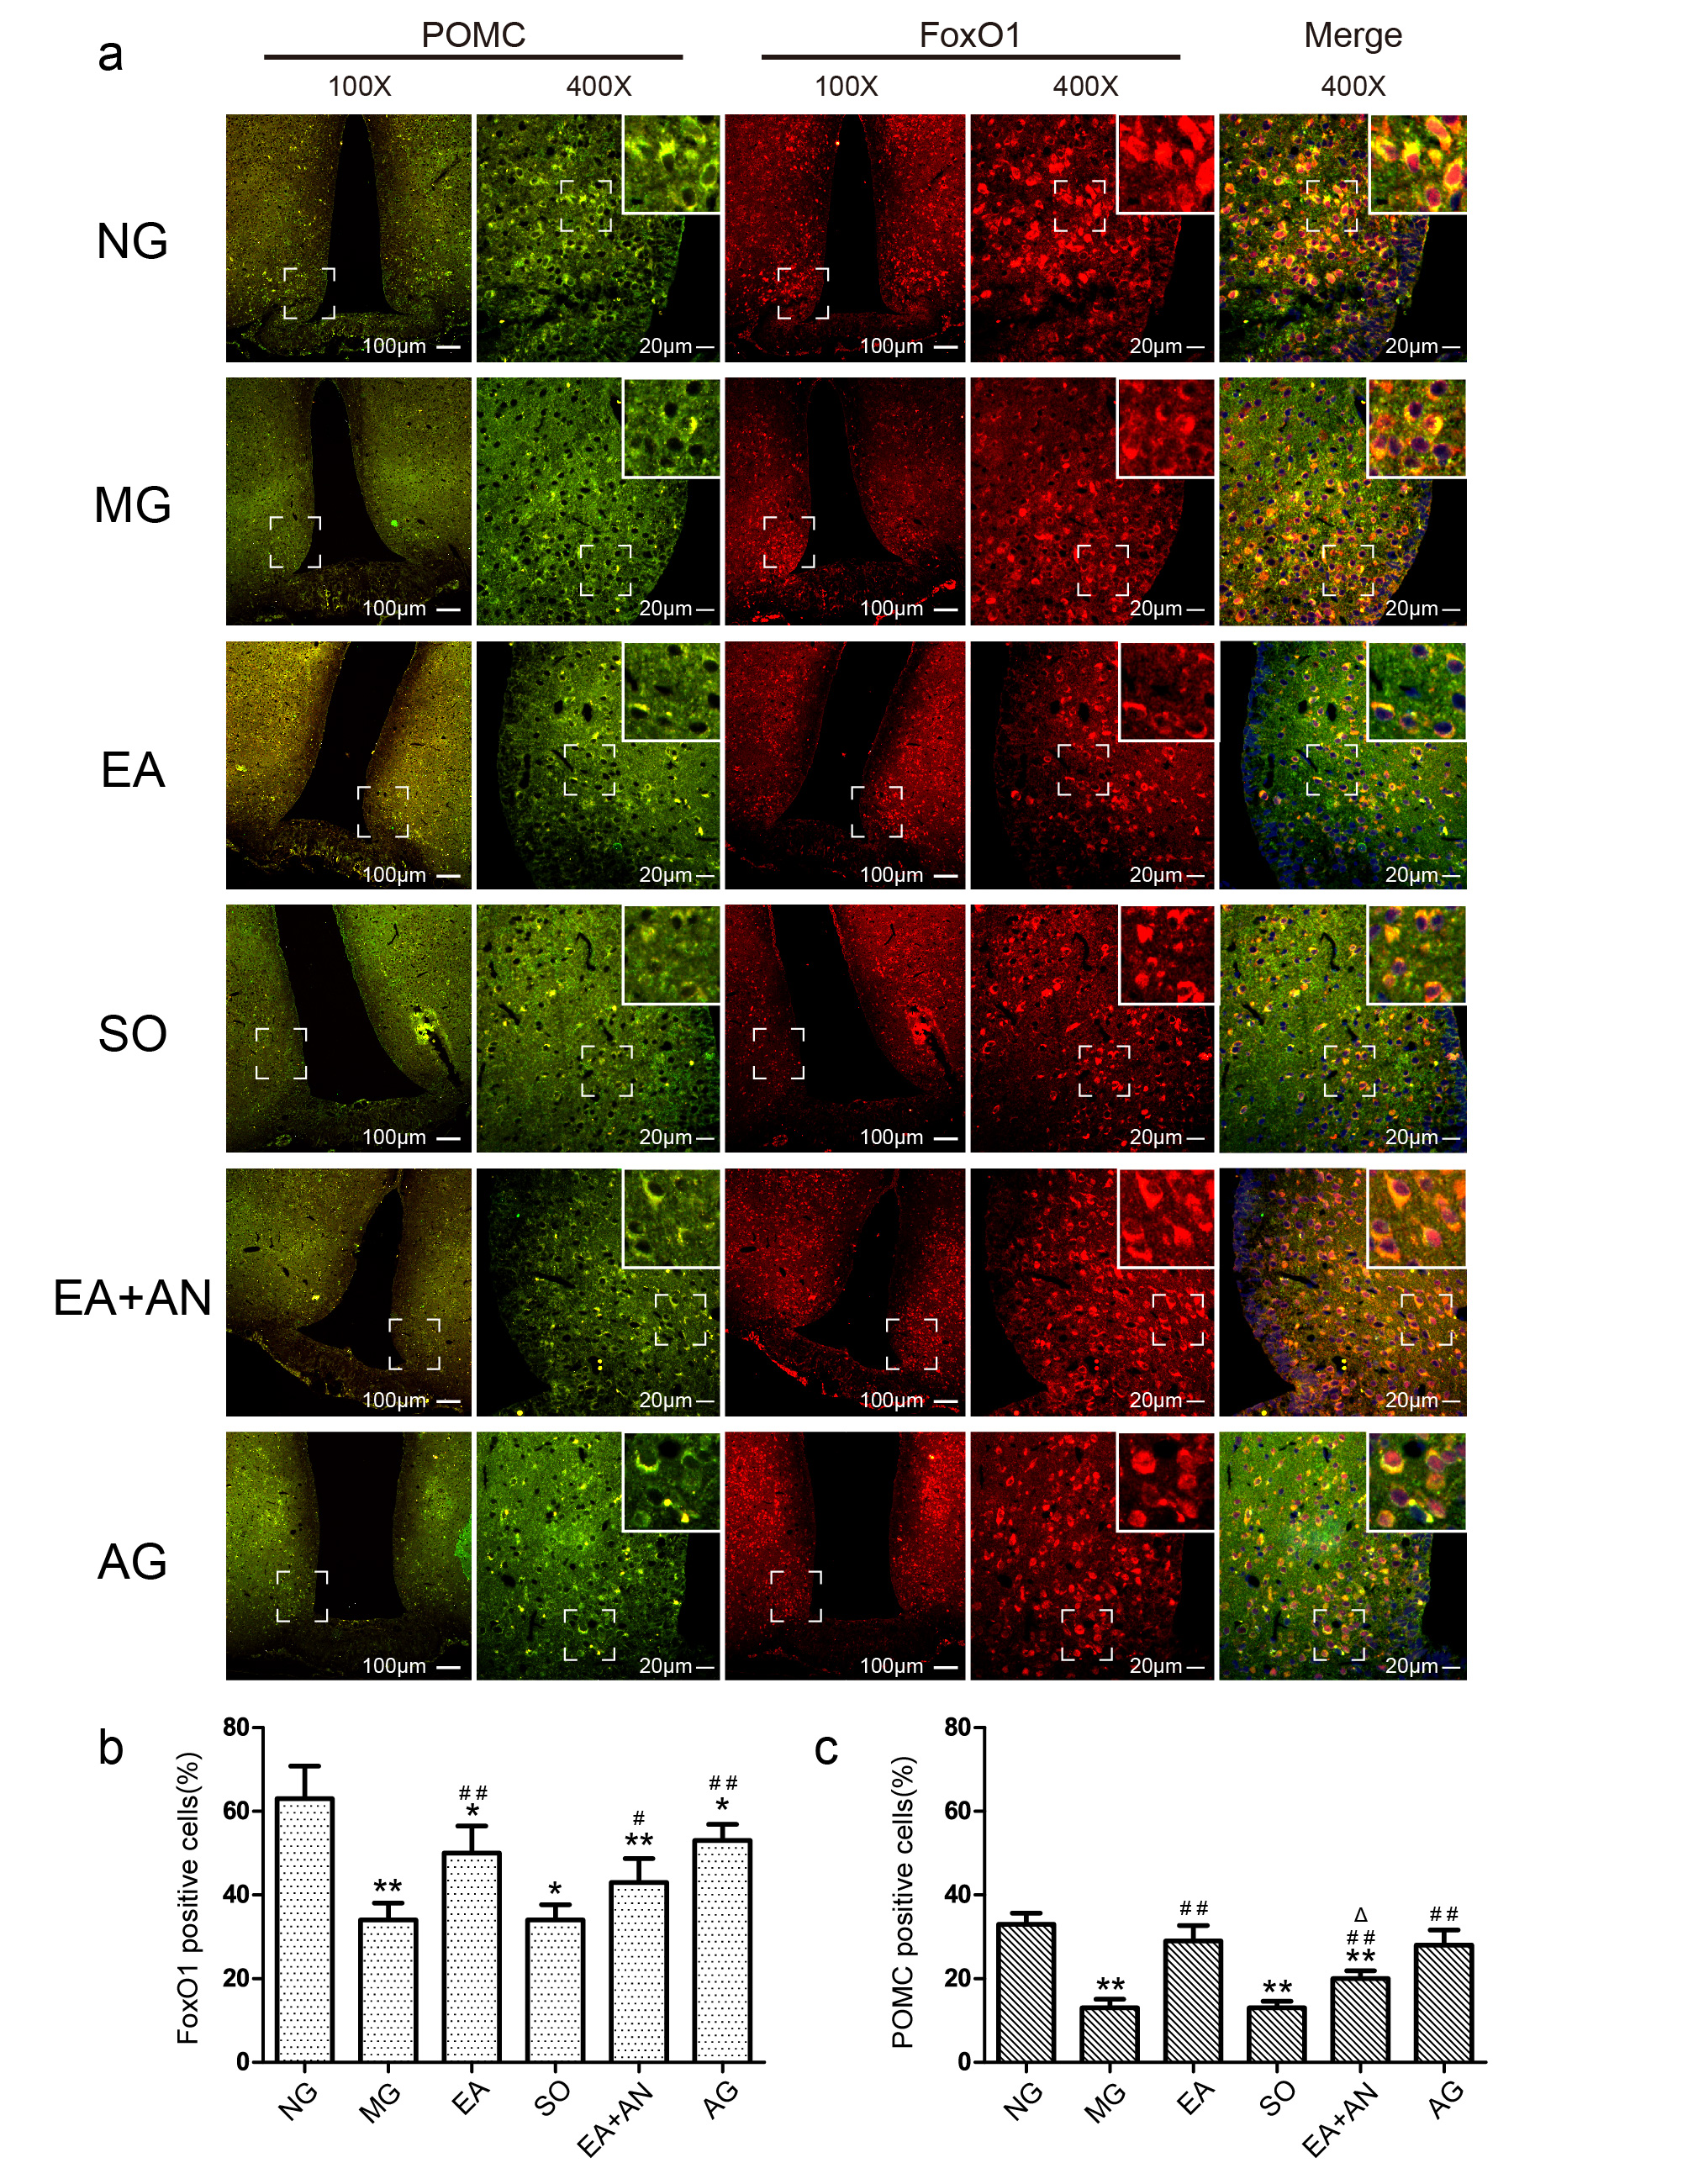

Supplement: Supplementary file 1 [file 1 › Supplementary material_Fig._3.jpg]

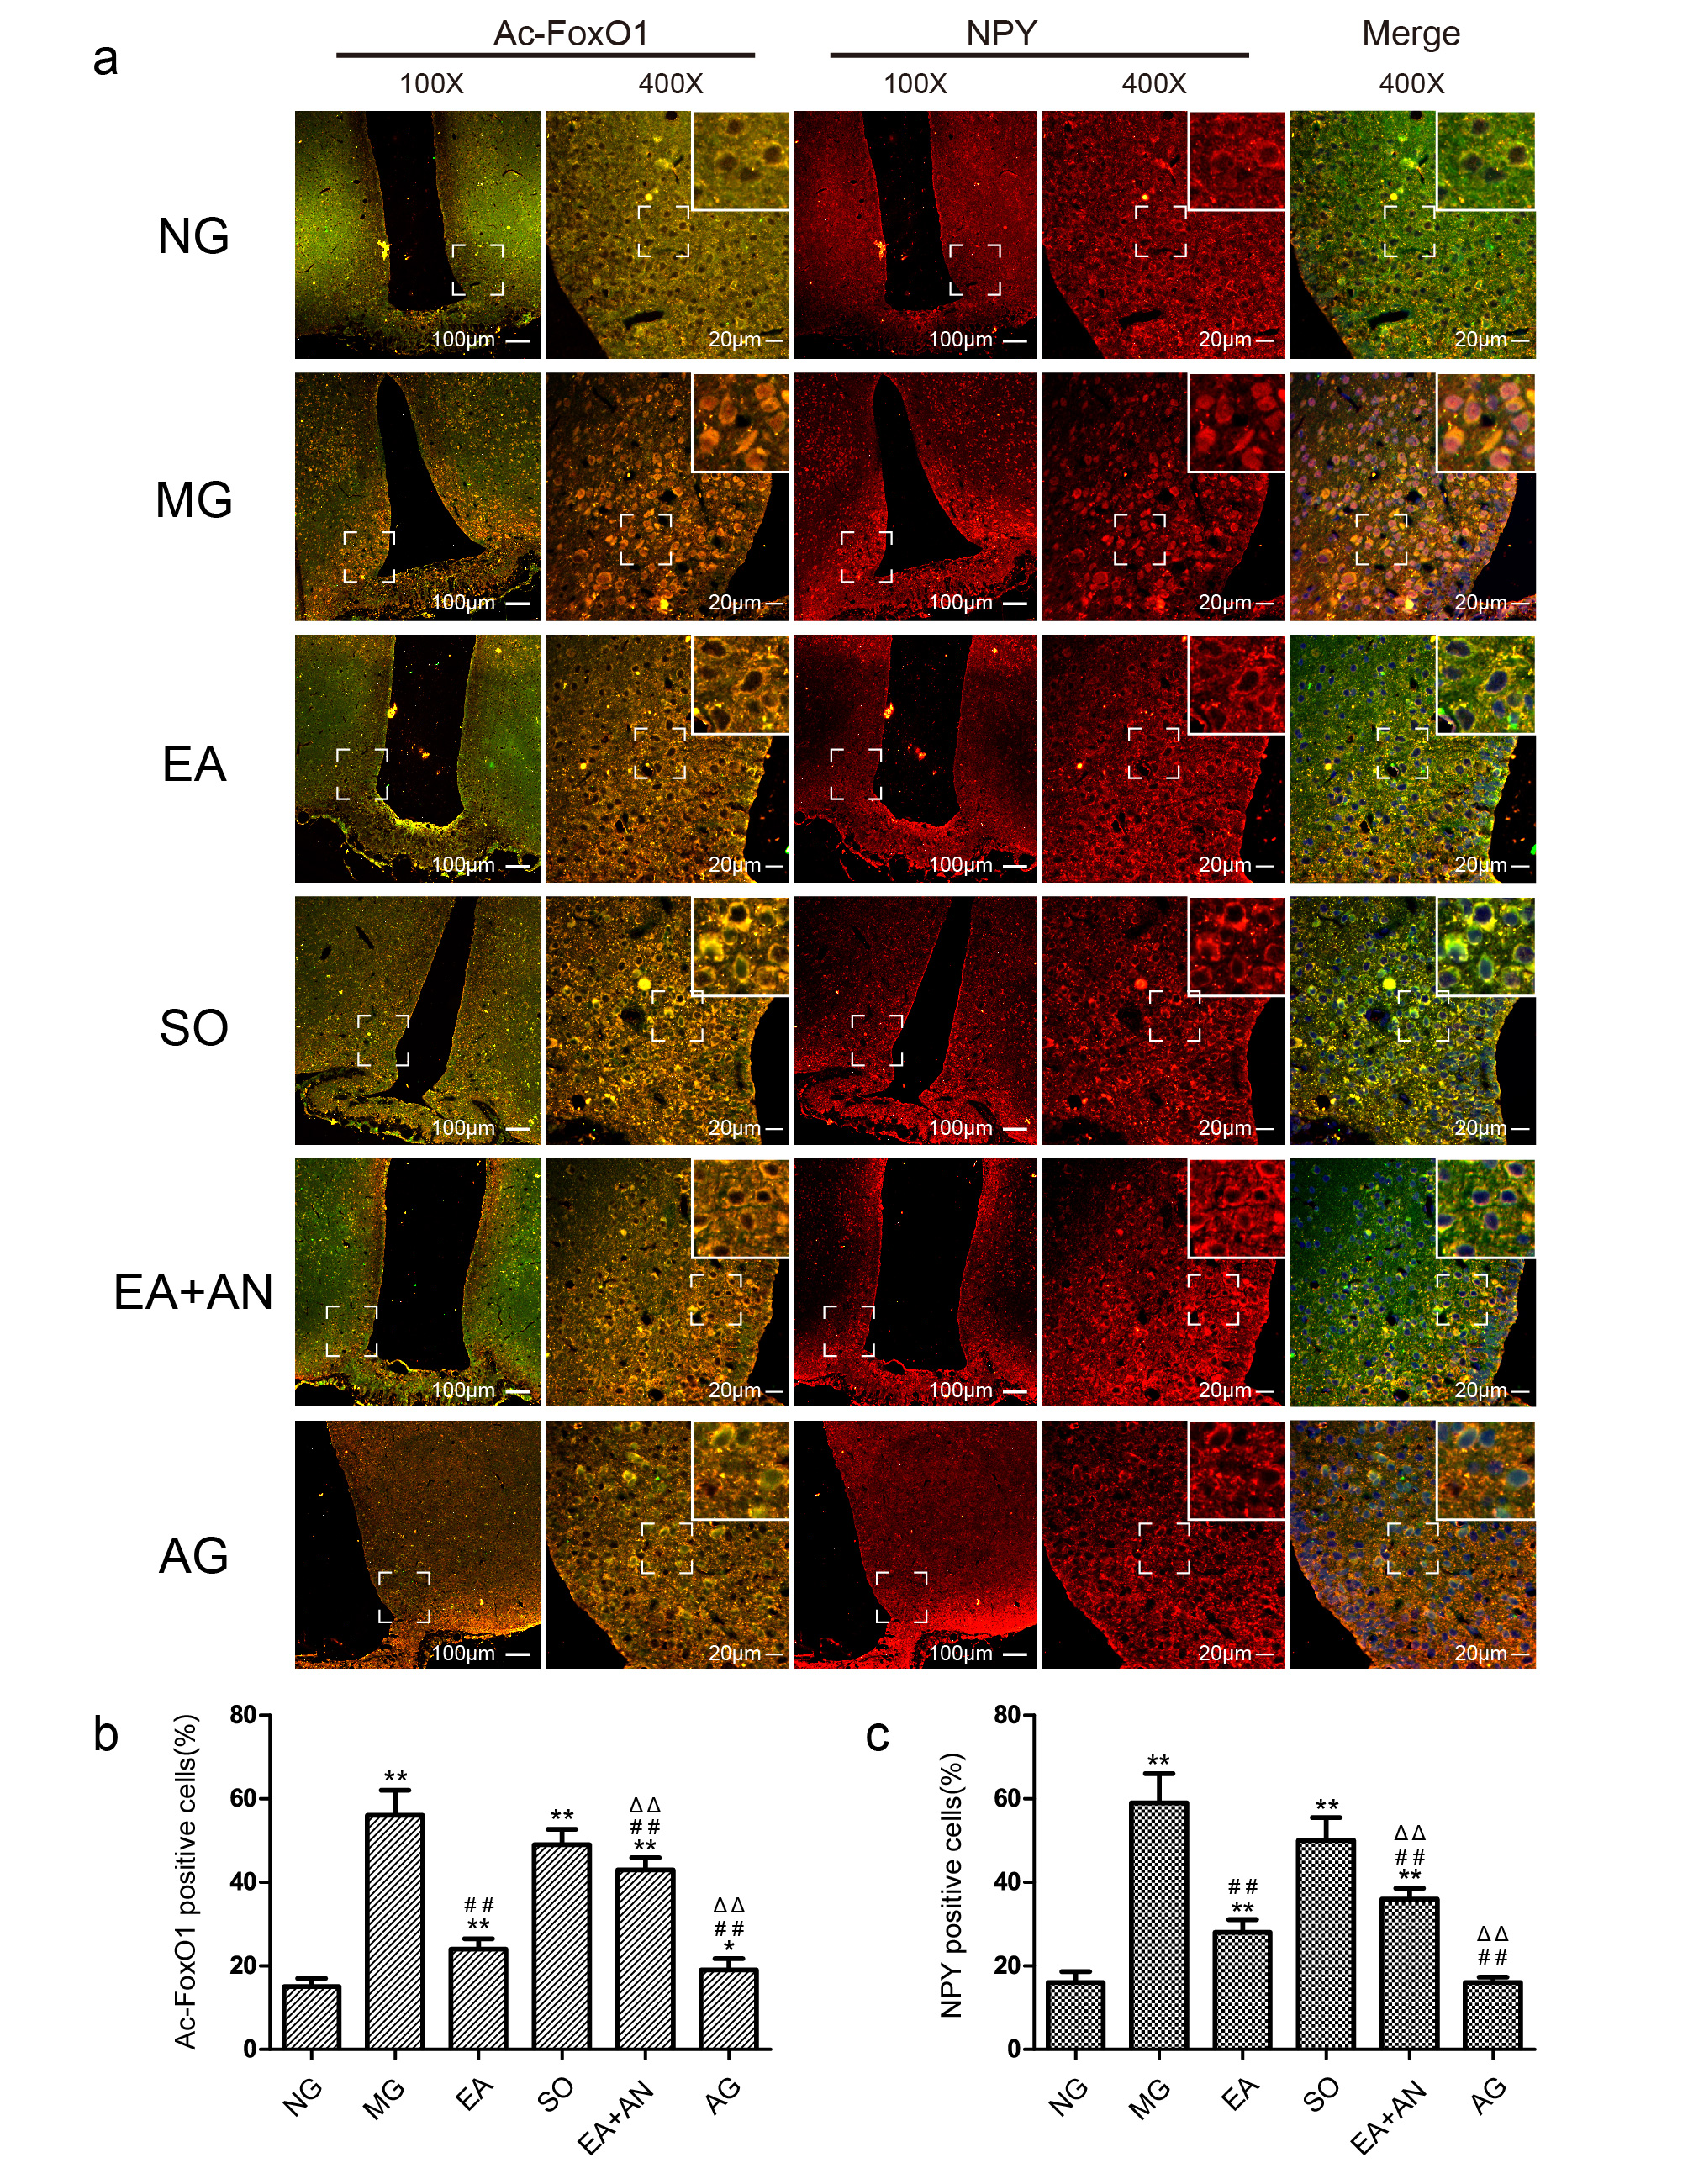

Supplement: Supplementary file 1 [file 1 › Supplementary material_Fig._4.jpg]
